# Supplementary material
Source: bioRxiv or medRxiv preprint supplement (https://www.biorxiv.org/highwire/filestream/73188/field_highwire_adjunct_files/7/091512-6.pdf)

**Figure S6A**

Phylum

- Actinobacteria
- Bacteroidetes
- Cyanobacteria
- Proteobacteria
- Unc. Bacteria
- Verrucomicrobia
- Acidobacteria
- Chloroflexi
- Nitrospirae
- Chlorobi
- Gemmatimonadetes
- Planctomycetes

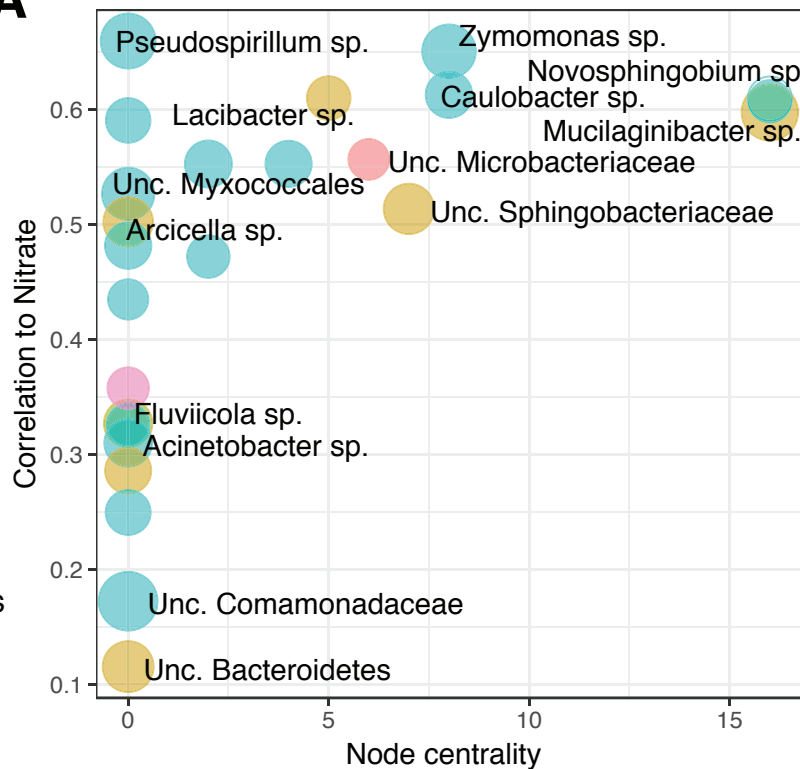**B**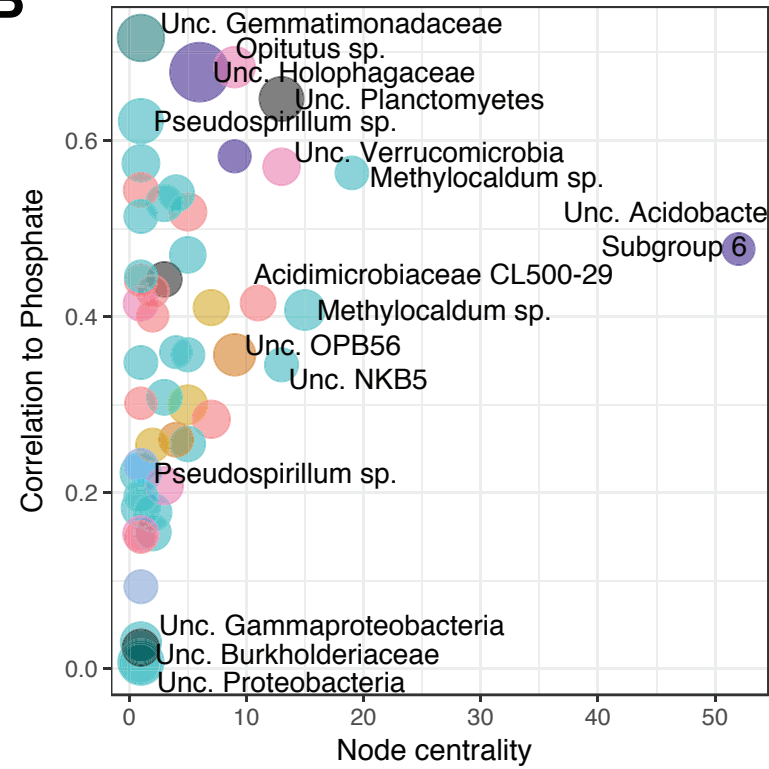**C**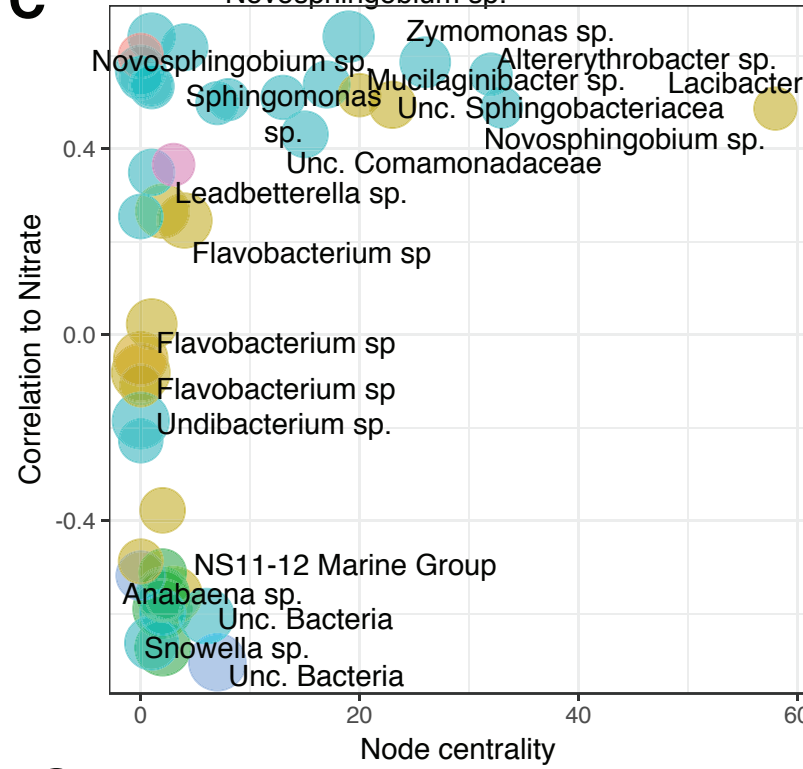**D**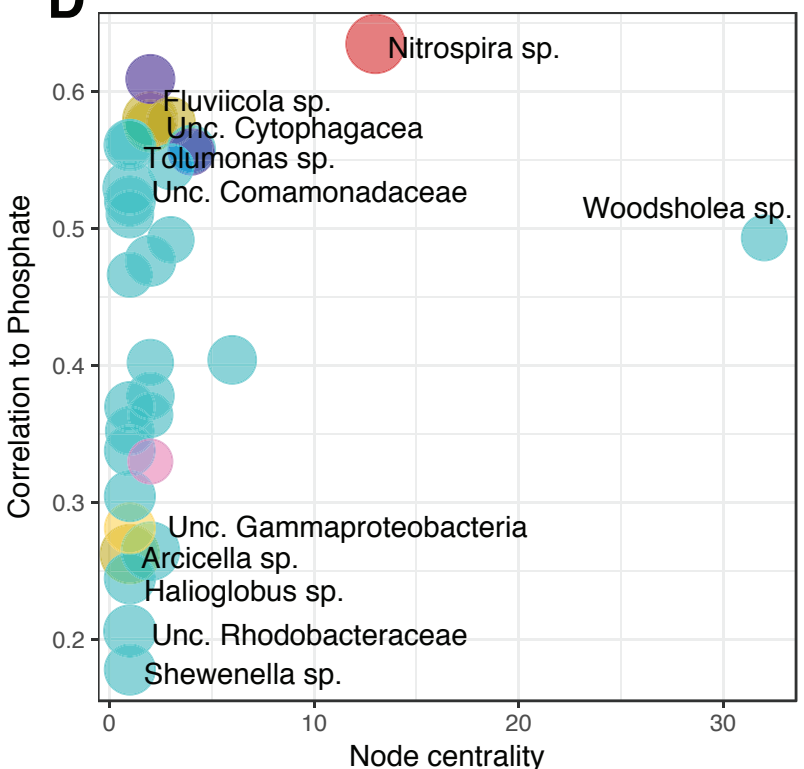**E**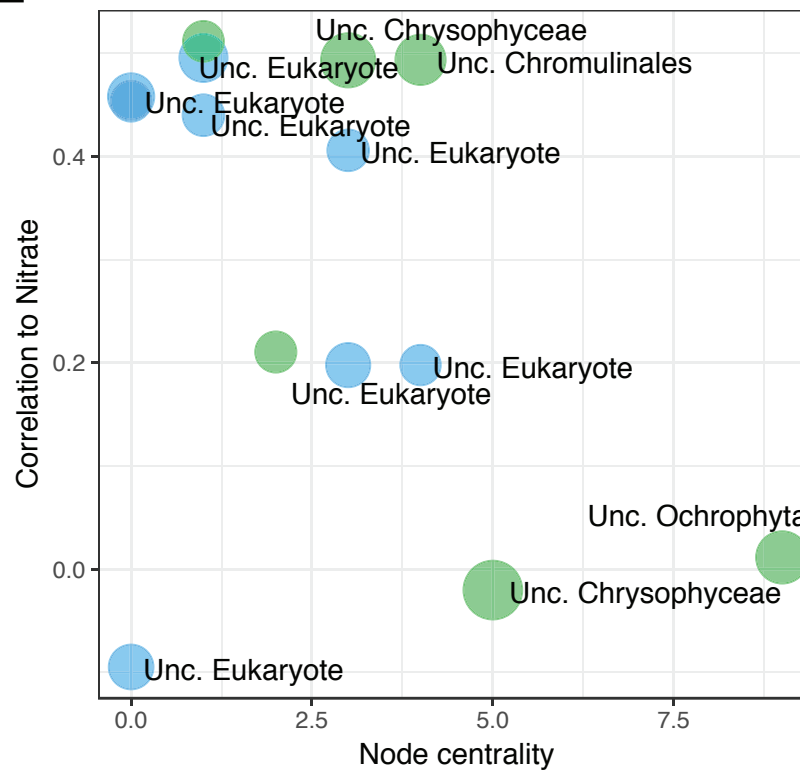**F**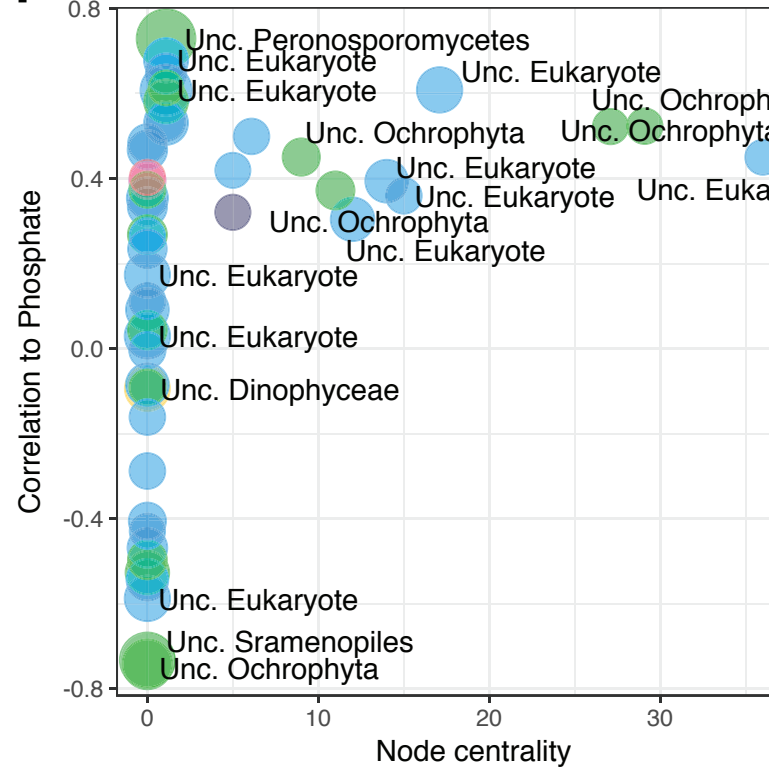**G**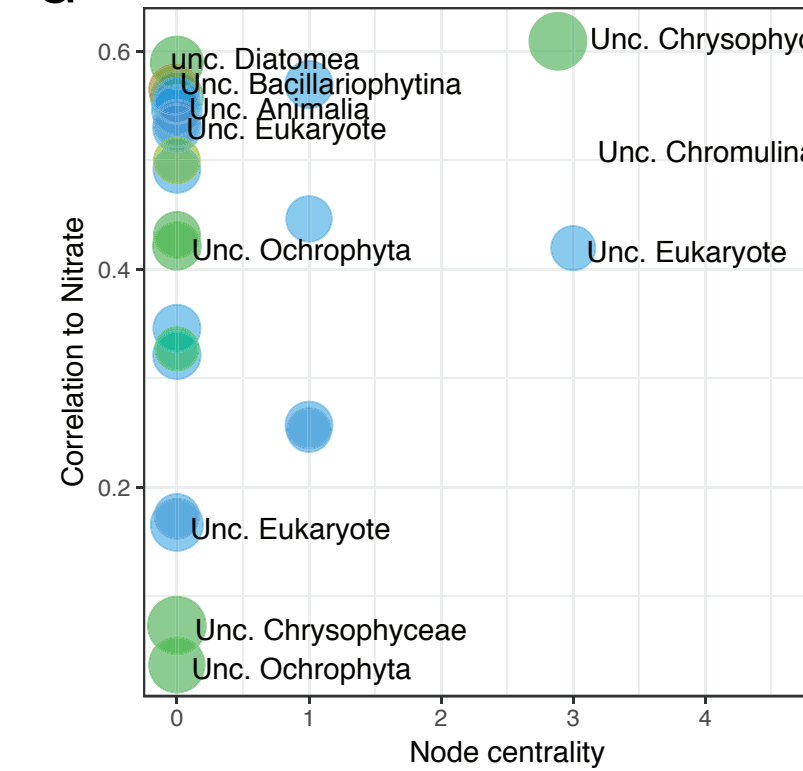**H**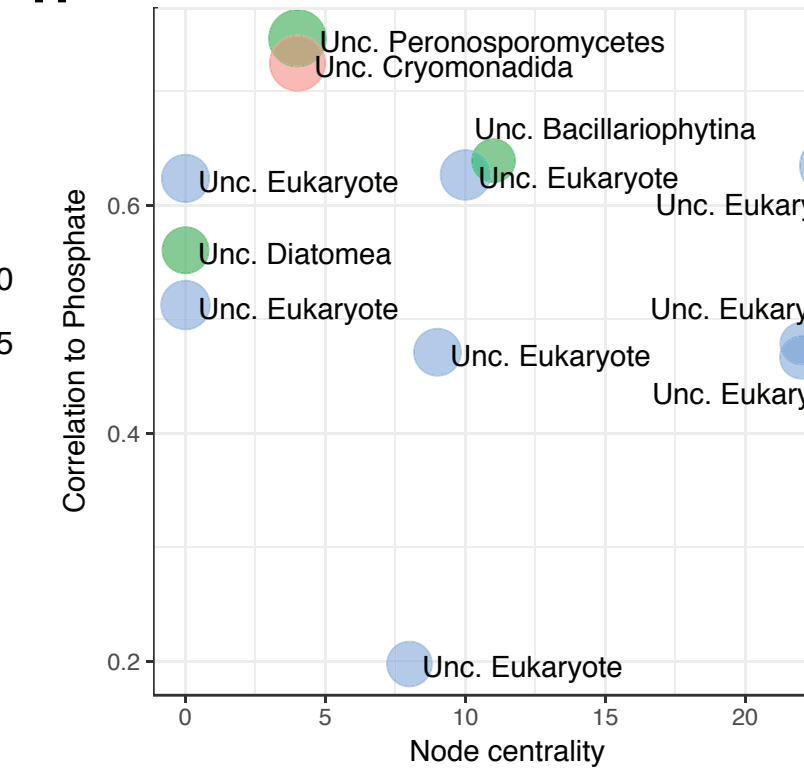

Supplement: Supplementary file [file 091512-6.pdf]
